# Supplementary material
Source: publisher figshare collection journal article supplement (https://acs.figshare.com/ndownloader/files/4517698)
Supplement: Supplementary file 1 [file 4517698]

## Supporting information

to the article

### $\beta$ -Agostic Silylamido and Silyl-Hydrido Compounds of Molybdenum and Tungsten

by Stanislav K. Ignatov, Andrey Y. Khalimon, Nicholas H. Rees, Alexei G. Razuvaev, Philip Mountford and Georgii I. Nikonov

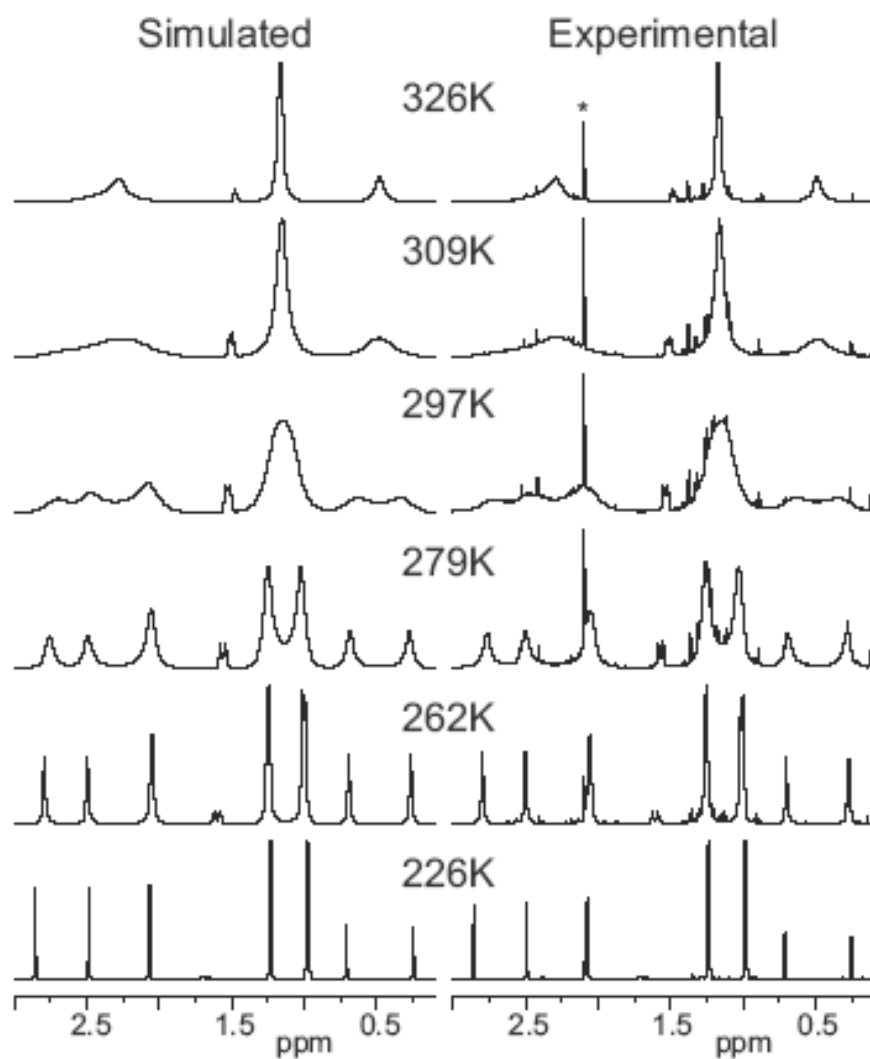

Figure SI1. Experimental (right) and simulated (left) VT <sup>1</sup>H NMR spectra for the degenerate exchange in compound **3c**.
